# Supplementary material for: Oxidative Stress Regulation on Endothelial Cells by Hydrophilic Astaxanthin Complex: Chemical, Biological, and Molecular Antioxidant Activity Evaluation
Source: PubMed Central journal article supplement (PMC5635468; doi:10.1155/2017/8073798), 2017-09-27
Supplement: 8073798.f1.pdf [file 8073798.f1.pdf]

## 1 Supporting information

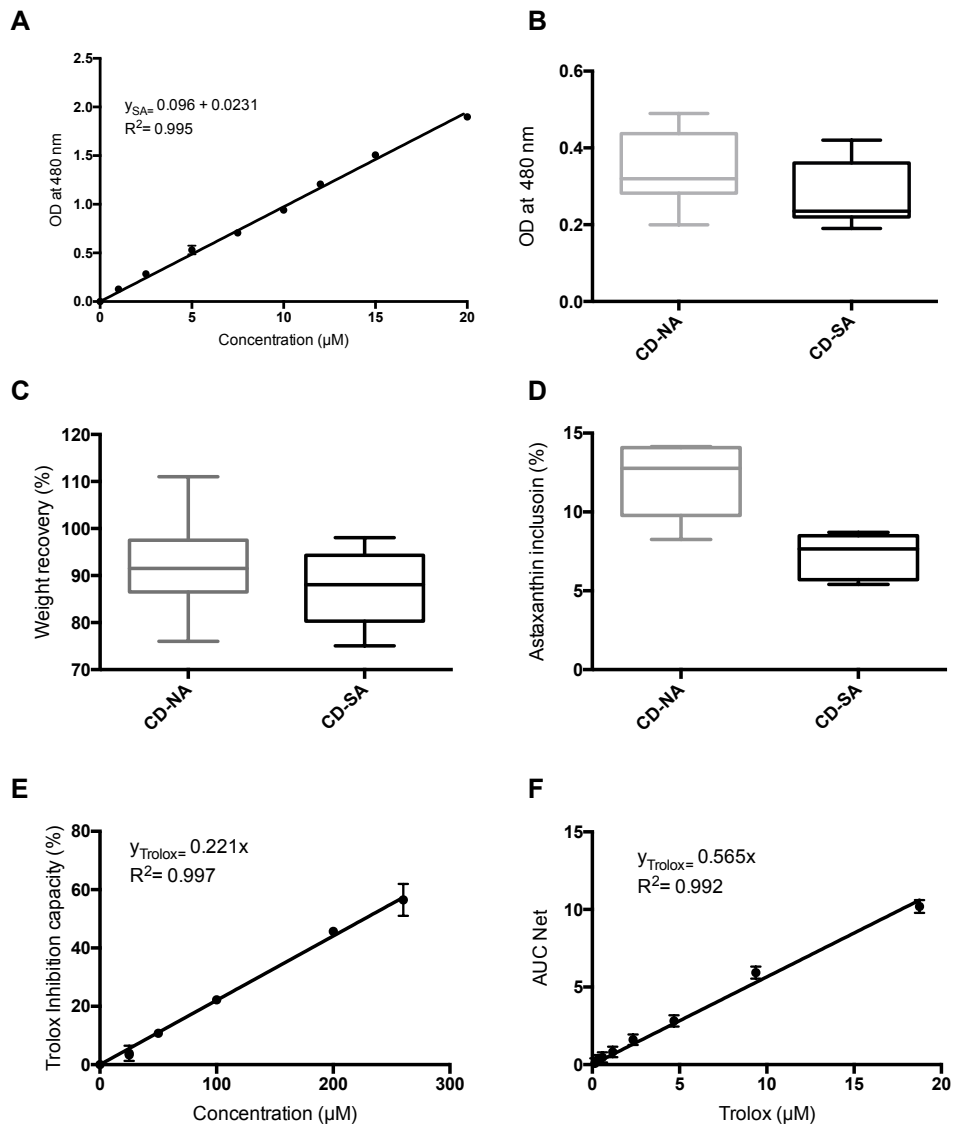

2

3 **Figure S1.** Characterization and astaxanthin quantification into CD complex. (A) SA calibration curve  
4 acquired by UV/VIS spectroscopy showed a good linear correlation between the concentration (X) and the  
5 absorbance (Y). (B) Concentrations of astaxanthin CD complex were established by recording the  
6 absorbance in DMSO at 480 nm. (C) Weight recovery rate and (D) CD-A inclusion capacity was calculated  
7 at the end of the procedure. Trolox calibration curves were plotted to calculate (E) Trolox inhibition capacity  
8 using TEAC/ABTS assay and (F) Trolox AUC net against concentration by ORAC assay. Data are means  
9  $\pm$  SD of six experiments.
